# Supplementary material
Source: publisher figshare collection journal article supplement (https://acs.figshare.com/ndownloader/files/38313114)
Supplement: Supplementary file 1 [file 38313114]

## Supporting Information

### Epitaxial growth of $\beta$ -Ga<sub>2</sub>O<sub>3</sub> thin films on Si with YSZ buffer layer

Hyung-Jin Choi<sup>1</sup>, Jun Young Lee<sup>1</sup>, Soo Young Jung<sup>1,2</sup>, Ruiguang Ning<sup>1,3</sup>, Min-Seok Kim<sup>1,4</sup>, Sung-Jin Jung<sup>1</sup>, Sung Ok Won<sup>5</sup>, Seung-Hyub Baek<sup>1,3,6,7\*</sup>, Ji-Soo Jang<sup>1\*</sup>

<sup>1</sup>*Electronic Materials Research Center, Korea Institute of Science and Technology, Seoul 02792, South Korea*

<sup>2</sup>*Department of Materials Science and Engineering, Seoul National University (SNU), Seoul 08826, Republic of Korea*

<sup>3</sup>*Division of Nano & Information Technology, KIST School, Korea University of Science and Technology, Seoul 02792, South Korea*

<sup>4</sup>*Department of Materials Science and Engineering, Research Institute of Advanced Materials, Seoul National University, Seoul, 08826, Republic of Korea*

<sup>5</sup>*Advanced Analysis Center, Korea Institute of Science and Technology, Seoul, 02792, Republic of Korea*

<sup>6</sup>*Department of Materials Science and Engineering, Yonsei University, Seoul 03722, Republic of Korea*

<sup>7</sup>*Yonsei-KIST Convergence Research Institute, Korea Institute of Science and Technology, Seoul 02792, Republic of Korea*

\*To whom correspondence should be addressed. E-mail: shbaek77@kist.re.kr, wkdwlt92@kist.re.kr

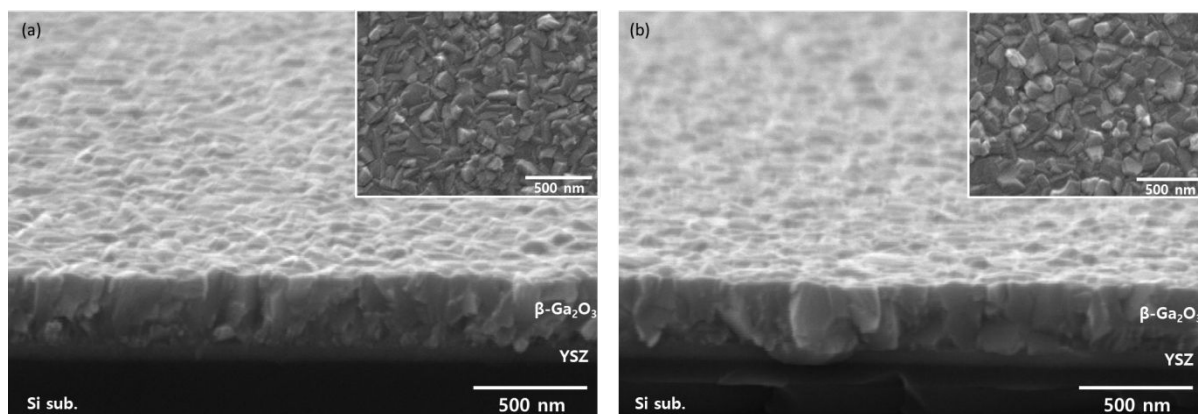

**Figure. S1.** Cross & surface SEM images of (a) the as-grown and (b) annealed  $\beta$ -Ga<sub>2</sub>O<sub>3</sub>/YSZ/Si

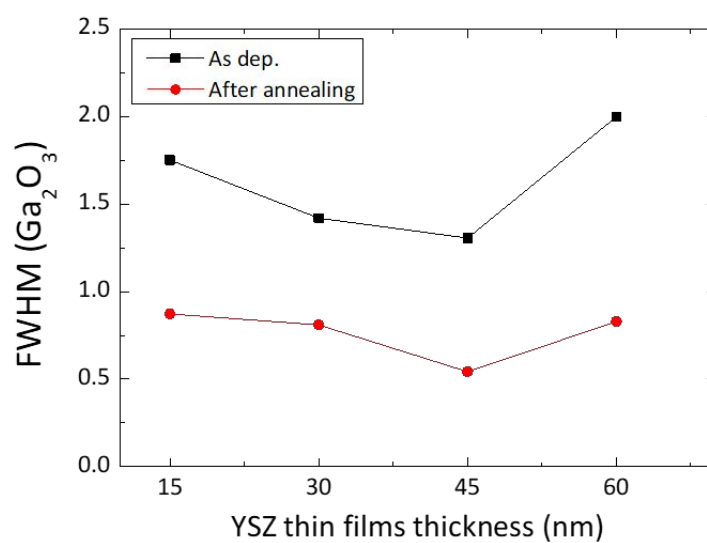

|                              | YSZ 15nm |              | YSZ 30nm |             | YSZ 45nm |              | YSZ 60nm |             |
|------------------------------|----------|--------------|----------|-------------|----------|--------------|----------|-------------|
| FWHM<br>(As/ <b>anneal</b> ) | 1.753    | <b>0.873</b> | 1.42     | <b>0.81</b> | 1.307    | <b>0.543</b> | 2.0      | <b>0.83</b> |

**Figure S2.** FWHM of the as-grown and annealed  $\beta$ -Ga<sub>2</sub>O<sub>3</sub>/YSZ/Si

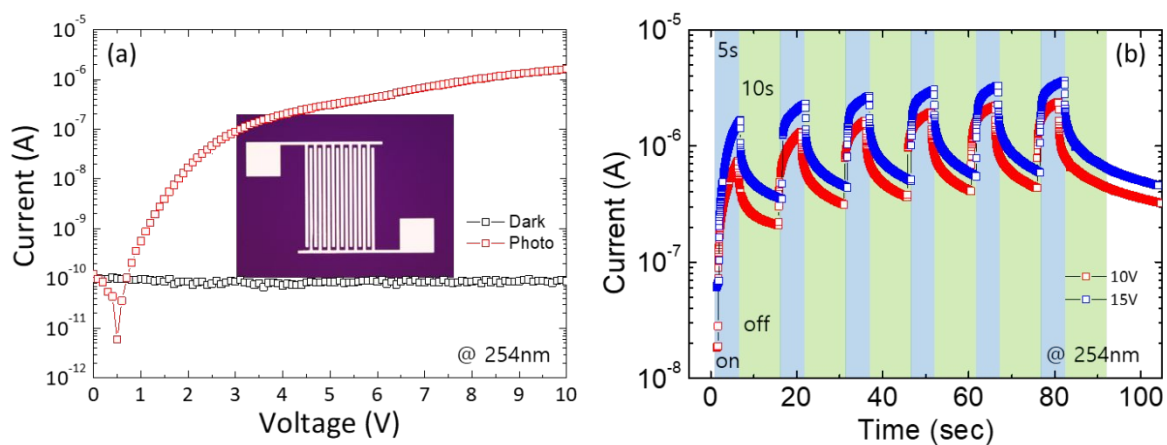

**Figure S3.** Current-voltage curve of the  $\beta\text{-Ga}_2\text{O}_3/\text{YSZ}/\text{Si}$  (a) photo/dark current and (b) on/off switching current
